# Supplementary material
Source: PubMed Central journal article supplement (PMC6533597)
Supplement: am9b03526_si_001.pdf [file am9b03526_si_001.pdf]

*New Generation of Mesoporous Silica Membranes Prepared by a  
Stöber-Solution Pore-Growth Approach*

*Marie-Alix Pizzoccaro-Zilamy<sup>†\*</sup>, Cindy Huiskes<sup>†</sup>, Enrico G. Keim<sup>†</sup>, Soraya Nicole Sluijter<sup>‡</sup>,  
Henk van Veen<sup>‡</sup>, Arian Nijmeijer<sup>†</sup>, Louis Winnubst<sup>†</sup>, and Mieke W.J. Luiten-Olieman<sup>†</sup>*

<sup>†</sup>Inorganic Membranes, MESA<sup>+</sup> Institute for Nanotechnology, University of Twente, P. O. Box 217, 7500 AE Enschede, The Netherlands

† MESA<sup>+</sup> NanoLab, MESA<sup>+</sup> Institute for Nanotechnology, University of Twente, P. O. Box 217, 7500 AE Enschede, The Netherlands

‡ Sustainable Process Technology group, TNO, unit ECN part of TNO, P.O. Box 15, 1755 ZG Petten, The Netherlands

\*m.d.pizzoccaro@utwente.nl

## 1. Schematic illustration for the Stöber-solution pore-growth synthesis

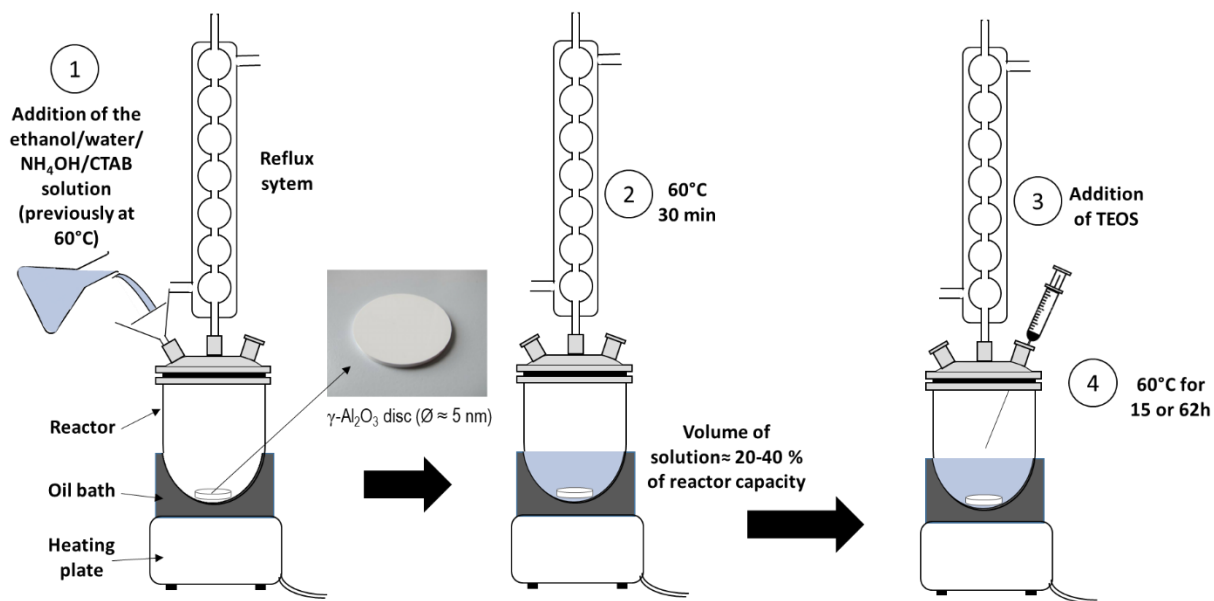

Figure S1. Schematic illustration for the Stöber-solution pore-growth synthesis.

## 2. SEM and permoporometry analysis of MSM-EISA

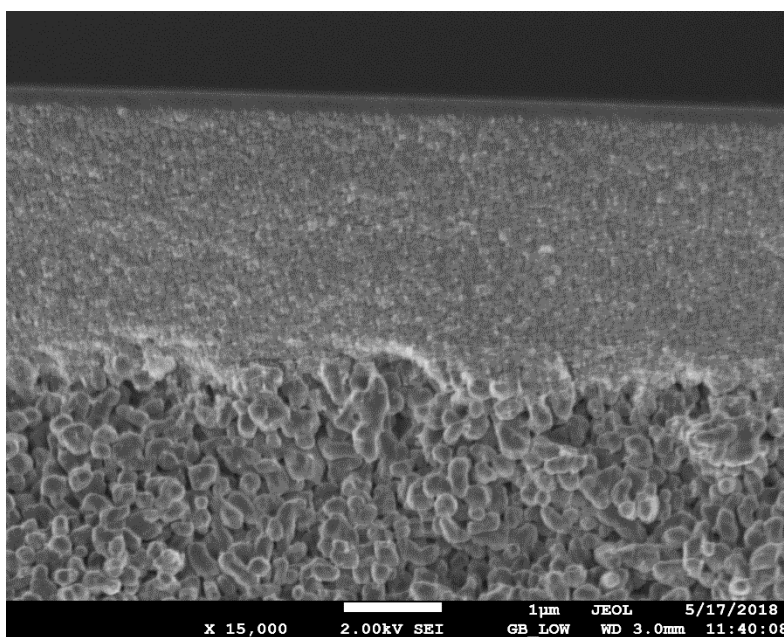

Figure S2. Cross-sectional FE-SEM image of the MSM-EISA sample.

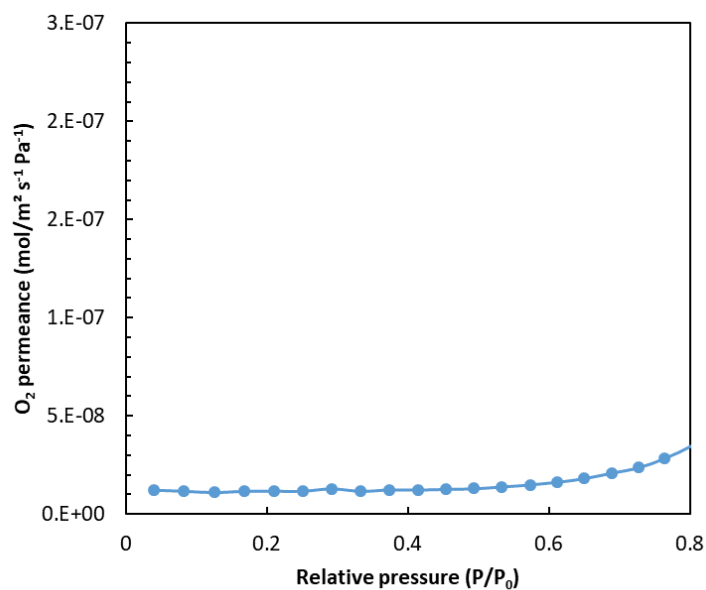

**Figure S3.** Oxygen flux vs. relative vapor pressure of cyclohexane for the MSM-EISA sample.

A constant oxygen permeance of  $1 \times 10^{-8}$  mol/(s m<sup>2</sup> Pa) was measured during the experiments. This value correspond to the detection limit of the experiment, and suggest thus that the O<sub>2</sub> permeance of the membrane is below  $1 \times 10^{-8}$  mol/(s m<sup>2</sup> Pa). The absence of clear transition point in this cyclohexane permoporometry curve suggests thus the presence of micropores (pore diameter < 2 nm).

### 3. Top-surface SEM pictures of the sample MSM-B62

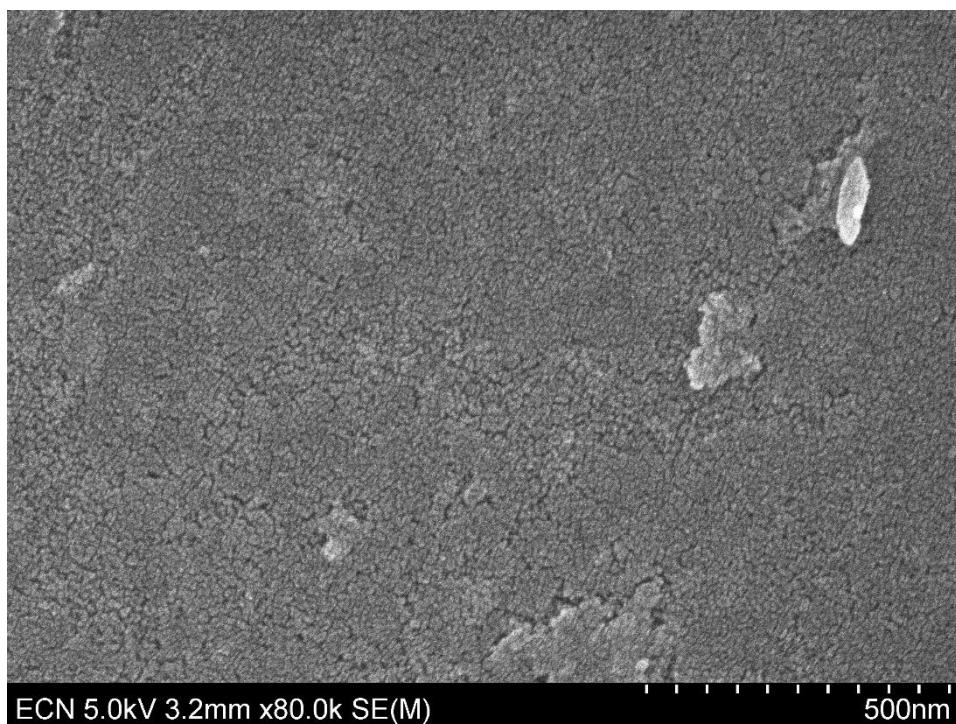

**Figure S4.** Top-surface FE-SEM images of the mesoporous silica membrane MSM-B62.

#### 4. EDX analysis

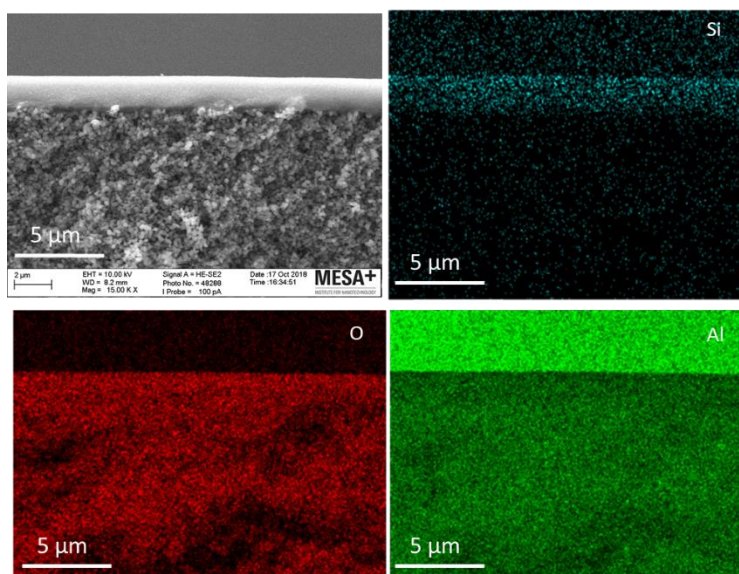

**Figure S5.** Cross-sectional FE-SEM image of the mesoporous silica membrane MSM-A15 and the corresponding EDXS maps.

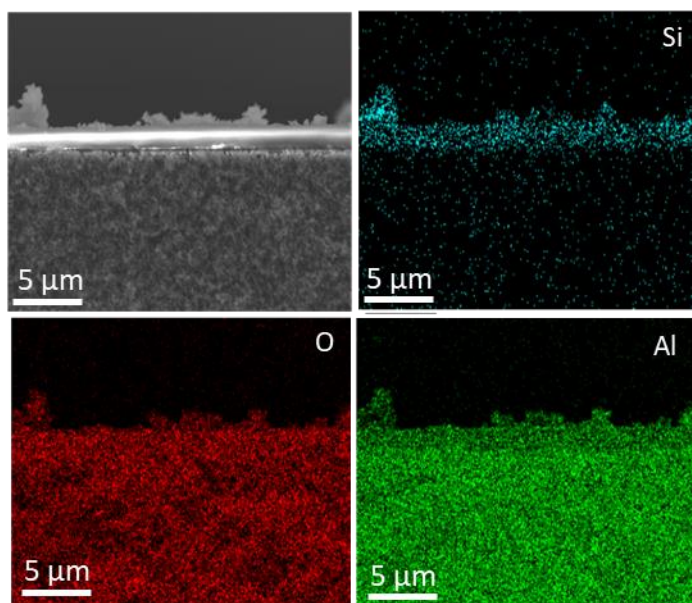

**Figure S6.** Cross-sectional FE-SEM image of the mesoporous silica membrane MSM-B15 and the corresponding EDXS maps.

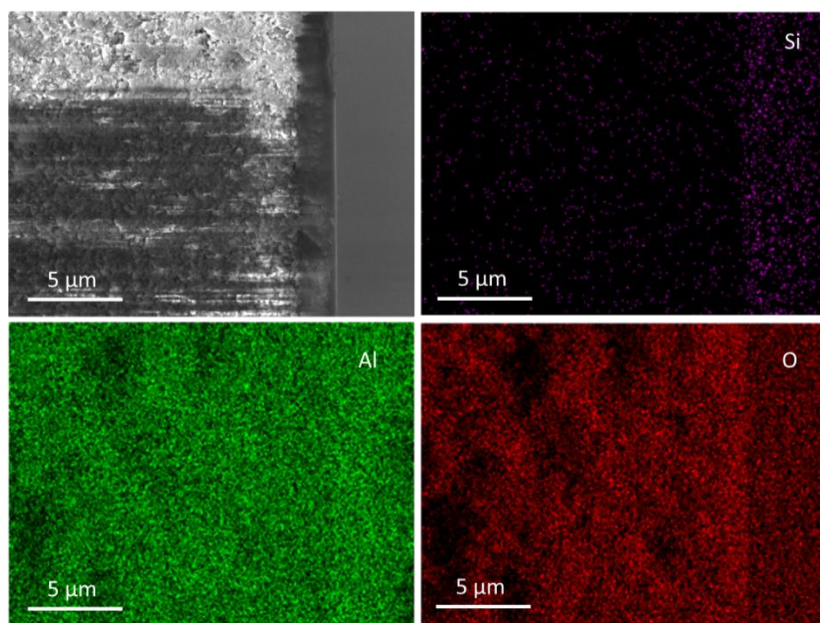

**Figure S7.** Cross-sectional FE-SEM image of the  $\gamma$ -Al<sub>2</sub>O<sub>3</sub> support and the corresponding EDXS maps.

### 5. STEM-in-a-SEM analysis of the particles in the sol as function of the reaction time

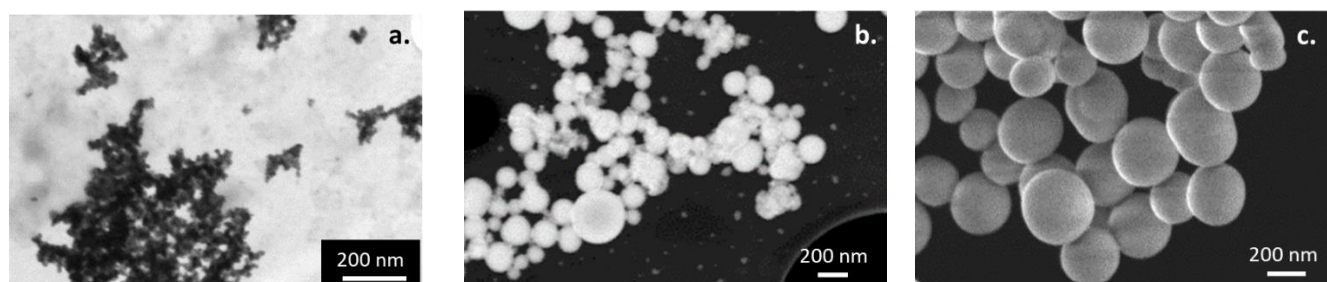

**Figure S8.** STEM-in-a-SEM pictures of the sol particles after reaction for 45 min (a.), 6h (b.) and 24h (c.).

## 6. Permporometry analysis

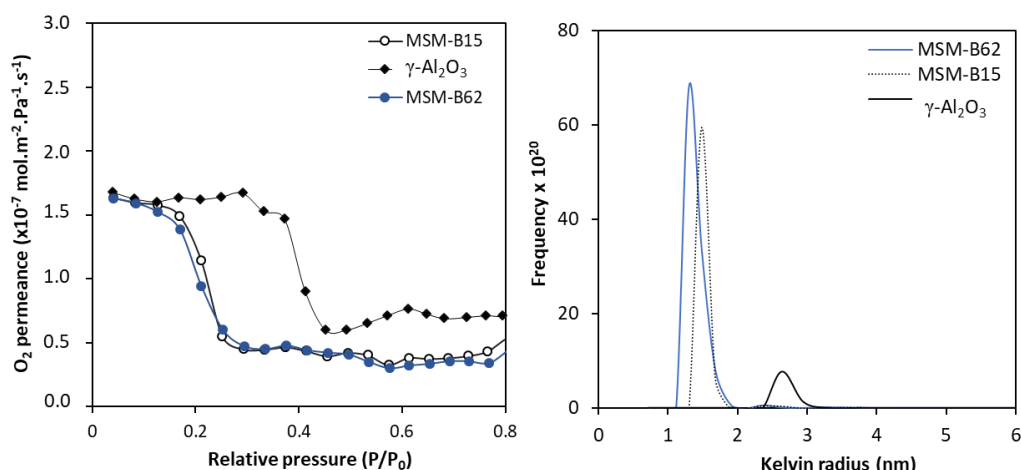

**Figure S9.** On the right Oxygen flux vs. relative vapor pressure of cyclohexane, on the left the pore size distribution for the mesoporous silica membranes and the pristine  $\gamma\text{-Al}_2\text{O}_3$  support.

## 7. MWCO measurements

The composition of the feed, permeate and retentate (obtained at 30% of recovery) was analyzed by gel permeation chromatography (GPC). The GPC setup consisted of two PSS SUPREMA columns: 1000 Å, 10  $\mu\text{m}$ , 8x300 mm and 30 Å, 10  $\mu\text{m}$ , 8x300 mm columns from PSS Polymer Standards Service GmbH (Germany), a HPLC pump from Agilent 1200 series modules. The columns were calibrated using 16 different PEG standards ( $M_w$ : 62 – 42,000  $\text{g.mol}^{-1}$ , PSS Polymer Standards Service GmbH, Germany). The GPC eluent consisted of pure water (MQ) containing 50 mg/L  $\text{NaN}_3$ . For each GPC analysis, 100  $\mu\text{L}$  of a sample was injected into the GPC, which ran at 1 mL/min. Every GPC measurement was performed at least on two samples prepared under the same reaction conditions to ensure reproducibility. The rejection  $R$  was determined via Equation 1, where  $C_{\text{permeate}}$  is the permeate concentration and  $C_{\text{cell}}$  the concentration inside the test cell. To correct for the inevitable accumulation of retained PEG molecules in a dead-end cell, the average of the original feed concentration and the final retentate concentration was used as  $C_{\text{cell}}$ .

$$R = 1 - \frac{C_{\text{permeate}}}{C_{\text{cell}}} \quad (1)$$

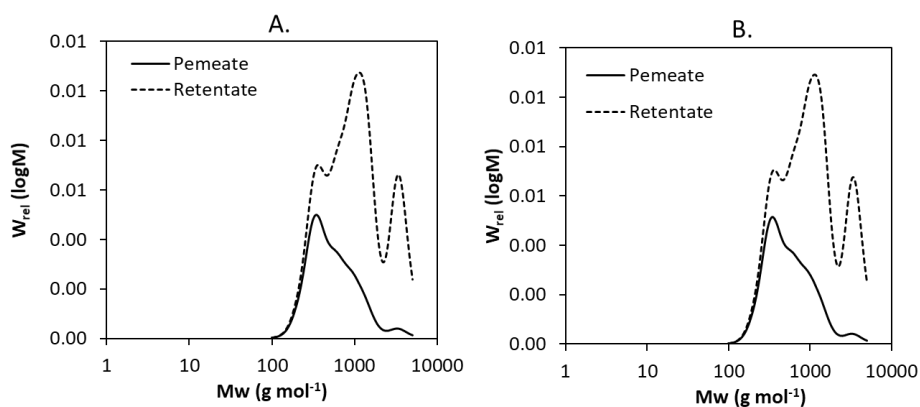

**Figure S10.** Molecular weight distribution of permeate and retentate for the membranes: A. MSM-B15, B. MSM-B62.

**Table S1.** Hydrodynamic diameters ( $d_H$ ) of various polyethylene glycol and the experimental rejection values obtained for the MSMs at a pressure of 10 bar in water.

| Solute                              | Mw (g/mol) | $d_H$ (nm) | MSM-B15        | MSM-B62        |
|-------------------------------------|------------|------------|----------------|----------------|
|                                     |            |            | R(%)           | R(%)           |
| PEG-300                             | 300        | 0.8        | 26             | 21             |
| PEG-600                             | 600        | 1.18       | 56             | 60             |
| PEG-1000                            | 1000       | 1.57       | 77             | 78             |
| PEG-1500                            | 1500       | 1.97       | 86             | 86             |
| PEG-3400                            | 3400       | 3.1        | 94             | 95             |
| Permeate Flux ( $L m^{-2} h^{-1}$ ) |            |            | $17.7 \pm 5.4$ | $17.7 \pm 1.1$ |

### 8. Low angle XRD analysis of the sample MSM-B62

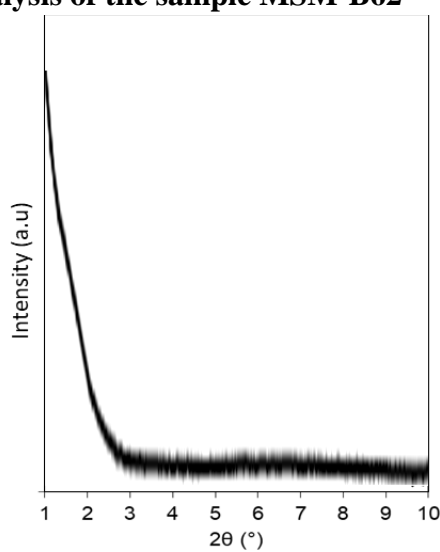

**Figure S11.** Low-angle XRD analysis for the mesoporous silica membrane MSM-B62.

## 9. GISAXS analysis of the sample MSM-B62

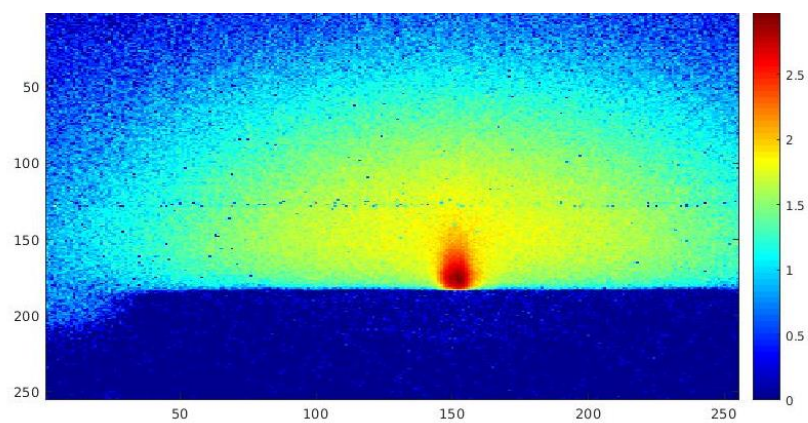

Figure S12. 2D-GISAXS scattering profiles of the mesoporous silica membrane MSM-B62.

## 10. Water flux vs. measurement time

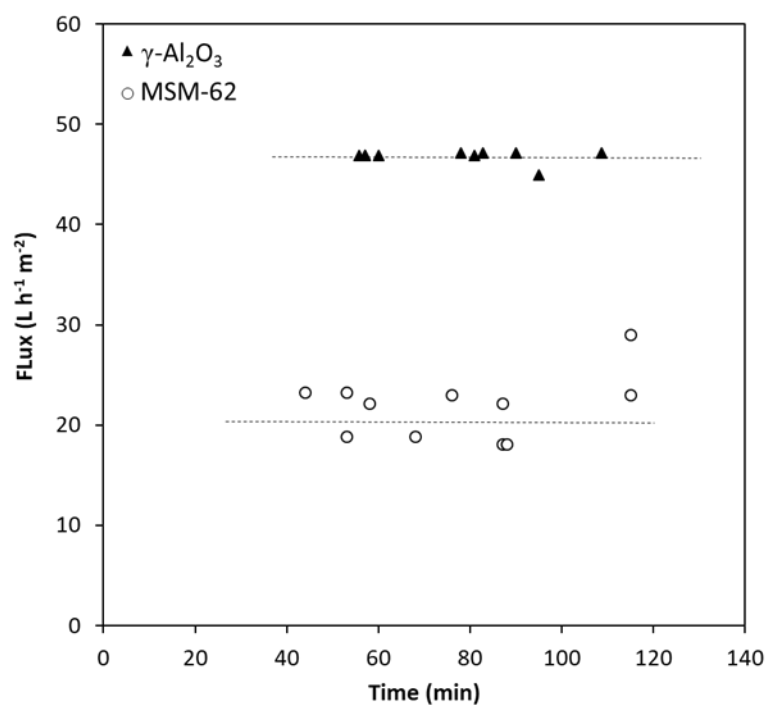

Figure S13. Water flux vs. measurement time through the pristine  $\gamma$ -Al<sub>2</sub>O<sub>3</sub> support and the MSM-B62 membrane at a constant applied pressure of 8 bar. Drawn lines serve as guide to the eye.



## 11. Water flux by the viscosity vs. applied pressure

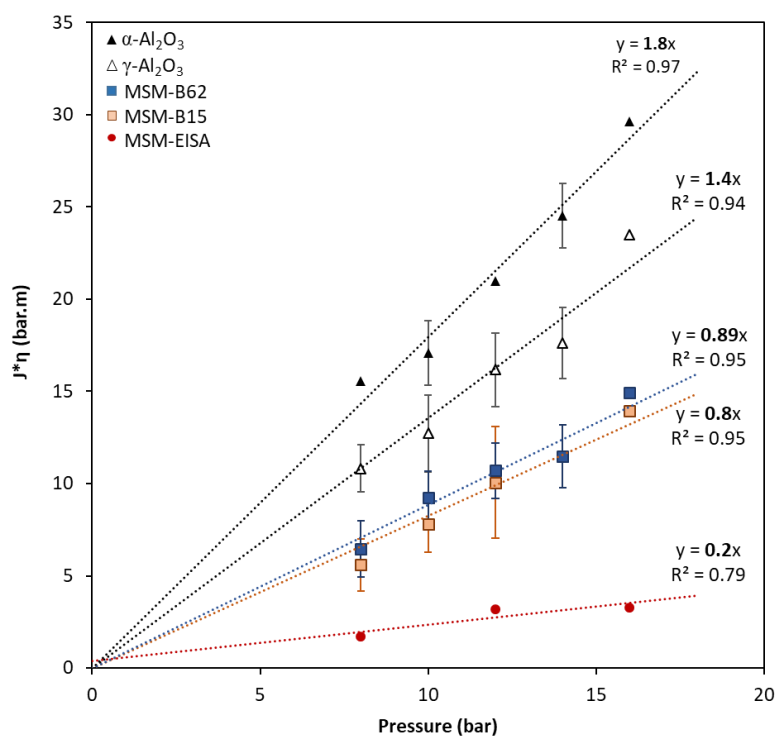

**Figure S14.** Viscosity corrected water flux vs. applied pressure for the  $\alpha\text{-Al}_2\text{O}_3$  and  $\gamma\text{-Al}_2\text{O}_3$  pristine supports, and the mesoporous silica membranes (MSM-B15, MSM-B62 and MSM-EISA).

## 12. Water contact angle measurements

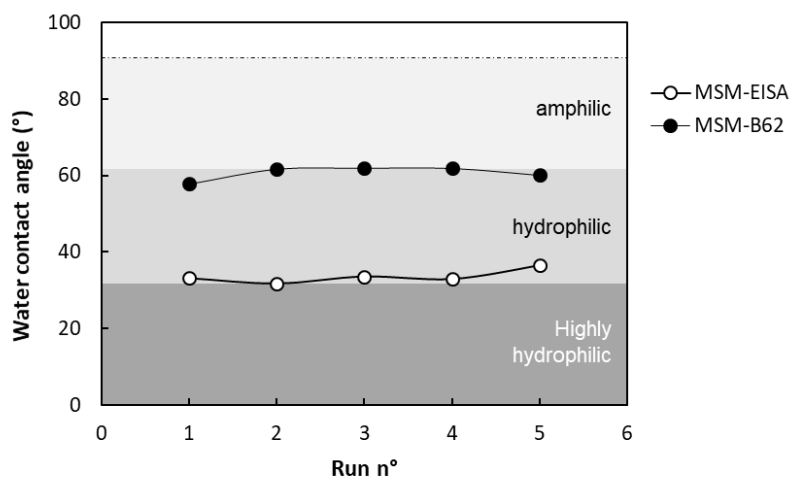

**Figure S15.** Water contact measurements of the mesoporous silica membranes: MSM-EISA and MSM-B62.
